# Supplementary material for: Deep conservation of prion-like composition in the eukaryotic prion-former Pub1/Tia1 family and its relatives
Source: PeerJ journal article supplement (doi:10.7717/peerj.9023), 2020-04-17

Tree scale: 1

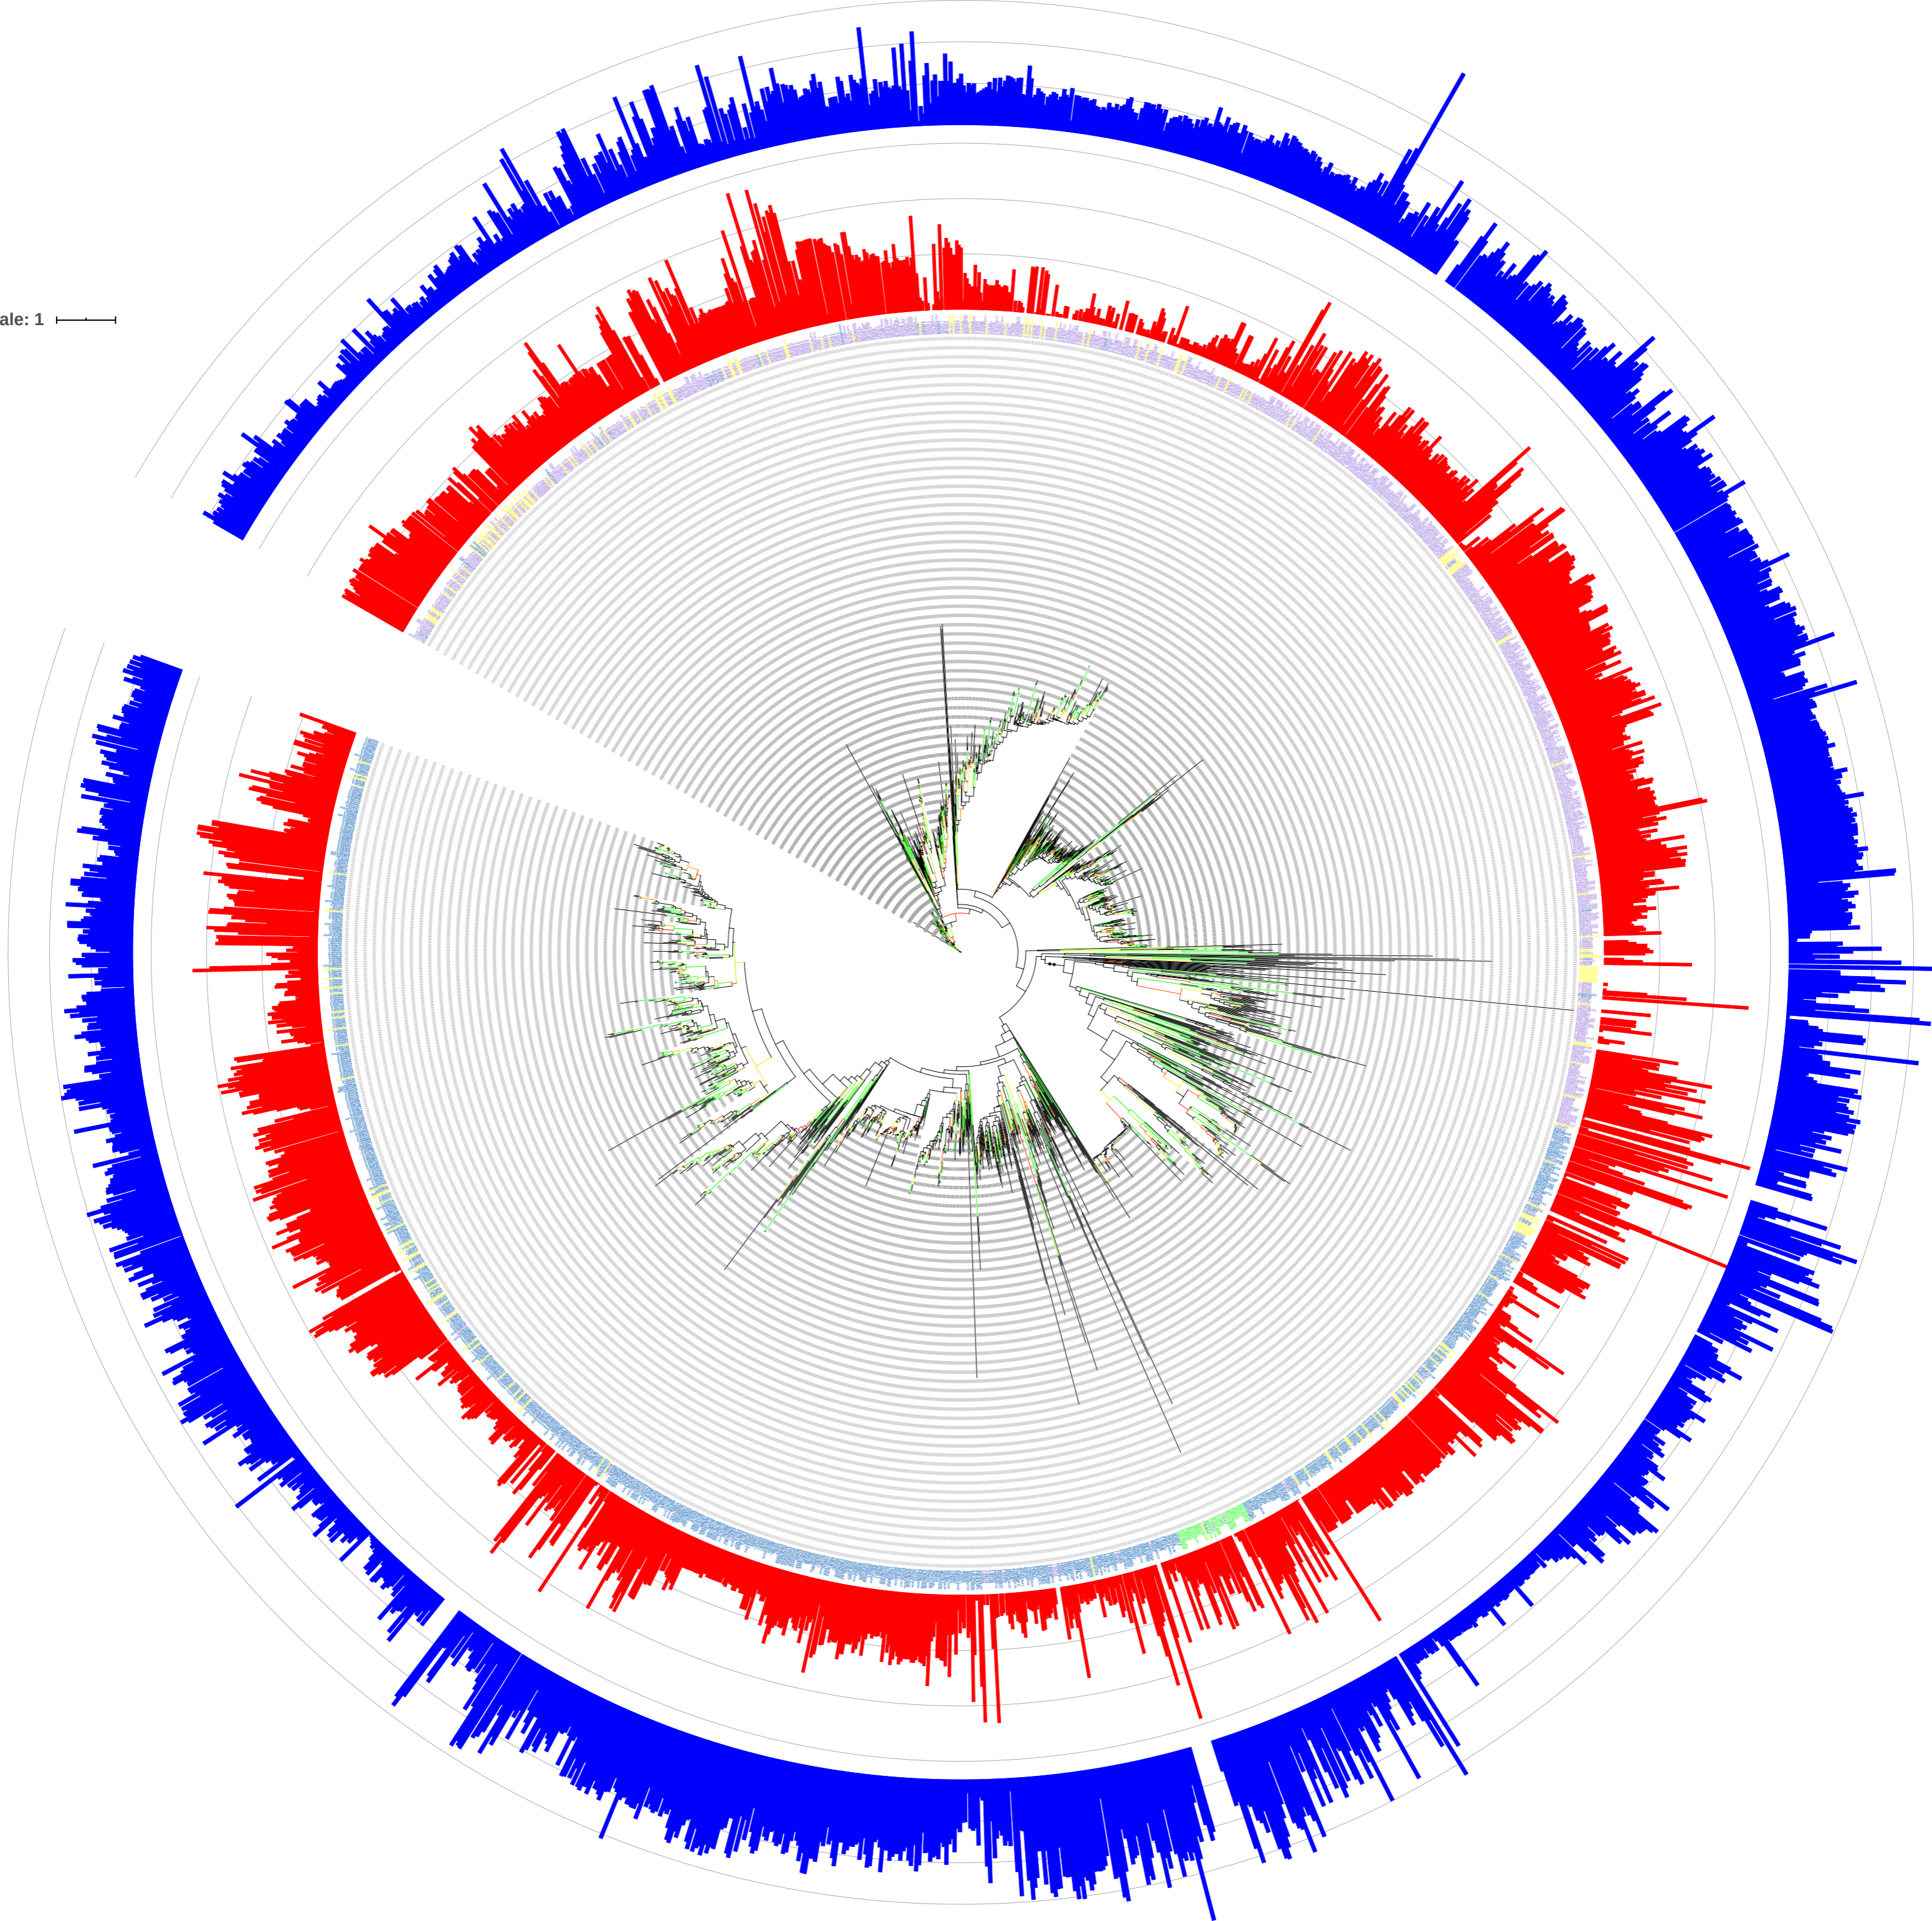

Supplement: FigureS1.pdf [file FigureS1.pdf]
