# Supplementary material for: Deep conservation of prion-like composition in the eukaryotic prion-former Pub1/Tia1 family and its relatives
Source: PeerJ journal article supplement (doi:10.7717/peerj.9023), 2020-04-17
Supplement: TableS1.pdf [file TableS1.pdf]

**Standard BLASTP output for comparing Pub1 to the yeast proteome (from the NCBI blast server**

<https://blast.ncbi.nlm.nih.gov/Blast.cgi>; the lines for Pab1 are highlighted in yellow)

| Select for downloading or viewing reports | Description                                                                                                      | Max Score | Total Score | Query Coverage | E value | Per. Ident | Accession                   |
|-------------------------------------------|------------------------------------------------------------------------------------------------------------------|-----------|-------------|----------------|---------|------------|-----------------------------|
| Select seq<br>ref NP_014382.1             | <a href="#">Pub1p [Saccharomyces cerevisiae S288C]</a>                                                           | 931       | 931         | 100 %          | 0.0     | 100.0 %    | <a href="#">NP_014382.1</a> |
| Select seq<br>ref NP_011954.1             | <a href="#">Nam8p [Saccharomyces cerevisiae S288C]</a>                                                           | 108       | 108         | 75 %           | 4e-26   | 29.65 %    | <a href="#">NP_011954.1</a> |
| Select seq<br>ref NP_009771.3             | <a href="#">Ngr1p [Saccharomyces cerevisiae S288C]</a>                                                           | 97.1      | 97.1        | 66 %           | 6e-22   | 27.67 %    | <a href="#">NP_009771.3</a> |
| Select seq<br>pdb 6R5K D                  | <a href="#">Chain D, Polyadenylate-binding protein, cytoplasmic and nuclear [Saccharomyces cerevisiae S288C]</a> | 90.1      | 173         | 41 %           | 1e-19   | 26.60 %    | <a href="#">6R5K_D</a>      |
| Select seq<br>ref NP_011092.1             | <a href="#">polyadenylate-binding protein [Saccharomyces cerevisiae S288C]</a>                                   | 90.1      | 173         | 41 %           | 1e-19   | 26.60 %    | <a href="#">NP_011092.1</a> |
| Select seq<br>ref NP_011675.1             | <a href="#">Nsr1p [Saccharomyces cerevisiae S288C]</a>                                                           | 82.4      | 149         | 38 %           | 2e-17   | 26.09 %    | <a href="#">NP_011675.1</a> |
| Select seq<br>ref NP_014518.1             | <a href="#">Hrp1p [Saccharomyces cerevisiae S288C]</a>                                                           | 65.5      | 110         | 36 %           | 6e-12   | 26.04 %    | <a href="#">NP_014518.1</a> |
| Select seq<br>ref NP_116678.1             | <a href="#">Pes4p [Saccharomyces cerevisiae S288C]</a>                                                           | 58.5      | 58.5        | 20 %           | 1e-09   | 34.74 %    | <a href="#">NP_116678.1</a> |
| Select seq<br>ref NP_011879.1             | <a href="#">Mip6p [Saccharomyces cerevisiae S288C]</a>                                                           | 55.1      | 55.1        | 24 %           | 1e-08   | 30.28 %    | <a href="#">NP_011879.1</a> |

)

**Standard BLASTP output for comparing Nam8 to the yeast proteome (as above)**

|                               |                                                                                                                  |          |          |          |           |             |                                  |
|-------------------------------|------------------------------------------------------------------------------------------------------------------|----------|----------|----------|-----------|-------------|----------------------------------|
| Select seq<br>ref NP_011954.1 | <a href="#">Nam8p [Saccharomyces cerevisiae S288C]</a>                                                           | 106<br>7 | 106<br>7 | 100<br>% | 0.0       | 100.0<br>0% | <a href="#">NP_0119<br/>54.1</a> |
| Select seq<br>ref NP_009771.3 | <a href="#">Ngr1p [Saccharomyces cerevisiae S288C]</a>                                                           | 189      | 189      | 67<br>%  | 2e-<br>53 | 30.28<br>%  | <a href="#">NP_0097<br/>71.3</a> |
| Select seq<br>ref NP_014382.1 | <a href="#">Pub1p [Saccharomyces cerevisiae S288C]</a>                                                           | 78.<br>6 | 78.<br>6 | 35<br>%  | 4e-<br>16 | 34.03<br>%  | <a href="#">NP_0143<br/>82.1</a> |
| Select seq<br>pdb 6R5K D      | <a href="#">Chain D, Polyadenylate-binding protein, cytoplasmic and nuclear [Saccharomyces cerevisiae S288C]</a> | 66.<br>6 | 66.<br>6 | 69<br>%  | 4e-<br>12 | 21.38<br>%  | <a href="#">6R5K_D</a>           |
| Select seq<br>ref NP_011092.1 | <a href="#">polyadenylate-binding protein [Saccharomyces cerevisiae S288C]</a>                                   | 66.<br>6 | 66.<br>6 | 69<br>%  | 5e-<br>12 | 21.38<br>%  | <a href="#">NP_0110<br/>92.1</a> |
| Select seq<br>ref NP_014964.1 | <a href="#">U2 snRNP complex subunit HSH49 [Saccharomyces cerevisiae S288C]</a>                                  | 53.<br>5 | 84.<br>3 | 63<br>%  | 1e-<br>08 | 23.81<br>%  | <a href="#">NP_0149<br/>64.1</a> |
| Select seq<br>pdb 5LSB A      | <a href="#">Chain A, Protein Hsh49 [Saccharomyces cerevisiae S288C]</a>                                          | 53.<br>1 | 85.<br>9 | 65<br>%  | 2e-<br>08 | 23.81<br>%  | <a href="#">5LSB_A</a>           |
| Select seq<br>ref NP_014518.1 | <a href="#">Hrp1p [Saccharomyces cerevisiae S288C]</a>                                                           | 46.<br>2 | 130      | 24<br>%  | 1e-<br>05 | 38.89<br>%  | <a href="#">NP_0145<br/>18.1</a> |
| Select seq<br>ref NP_011471.1 | <a href="#">Rna15p [Saccharomyces cerevisiae S288C]</a>                                                          | 40.<br>8 | 40.<br>8 | 14<br>%  | 4e-<br>04 | 29.87<br>%  | <a href="#">NP_0114<br/>71.1</a> |

**Standard BLASTP output for comparing Ngr1 to the yeast proteome (as above)**

| <u>Description</u>            | <u>Max Score</u>                                                                                                 | <u>Total Score</u> | <u>Query Cover</u> | <u>E value</u> | <u>Per. Ident</u> | <u>Accession</u>                       |
|-------------------------------|------------------------------------------------------------------------------------------------------------------|--------------------|--------------------|----------------|-------------------|----------------------------------------|
| Select seq<br>ref NP_009771.3 | <a href="#">Ngr1p [Saccharomyces cerevisiae S288C]</a>                                                           | 1385               | 1385               | 100%           | 0.0               | 100.00%<br><a href="#">NP_009771.3</a> |
| Select seq<br>ref NP_011954.1 | <a href="#">Nam8p [Saccharomyces cerevisiae S288C]</a>                                                           | 194                | 194                | 62%            | 1e-54             | 31.15%<br><a href="#">NP_011954.1</a>  |
| Select seq<br>ref NP_014382.1 | <a href="#">Pub1p [Saccharomyces cerevisiae S288C]</a>                                                           | 70.5               | 70.5               | 21%            | 3e-13             | 35.17%<br><a href="#">NP_014382.1</a>  |
| Select seq<br>ref NP_011092.1 | <a href="#">polyadenylate-binding protein [Saccharomyces cerevisiae S288C]</a>                                   | 55.8               | 55.8               | 13%            | 1e-08             | 33.33%<br><a href="#">NP_011092.1</a>  |
| Select seq<br>pdb 6R5K D      | <a href="#">Chain D, Polyadenylate-binding protein, cytoplasmic and nuclear [Saccharomyces cerevisiae S288C]</a> | 55.8               | 55.8               | 13%            | 2e-08             | 33.33%<br><a href="#">6R5K_D</a>       |
| Select seq<br>ref NP_014518.1 | <a href="#">Hrp1p [Saccharomyces cerevisiae S288C]</a>                                                           | 44.7               | 44.7               | 11%            | 4e-05             | 30.49%<br><a href="#">NP_014518.1</a>  |
| Select seq<br>ref NP_014148.1 | <a href="#">Nrd1 complex RNA-binding subunit [Saccharomyces cerevisiae S288C]</a>                                | 43.9               | 43.9               | 10%            | 7e-05             | 32.86%<br><a href="#">NP_014148.1</a>  |
| Select seq<br>ref NP_011766.3 | <a href="#">Rie1p [Saccharomyces cerevisiae S288C]</a>                                                           | 40.0               | 40.0               | 10%            | 0.001             | 30.26%<br><a href="#">NP_011766.3</a>  |
| Select seq<br>ref NP_009819.1 | <a href="#">Rgd1p [Saccharomyces cerevisiae S288C]</a>                                                           | 28.1               | 28.1               | 11%            | 7.0               | 28.57%<br><a href="#">NP_009819.1</a>  |
